1 **Screening and selection of 21 novel microhaplotype markers for ancestry inference in ten**  
2 **Chinese Subpopulations**

3  
4 **Abstract**

5 Genetic findings suggested that ethnolinguistically diverse populations in China harbor  
6 differentiated genetic structure and complex evolutionary admixture history, which provide the genetic  
7 basis and theoretical foundation for forensic biogeographical ancestry inference (BGAI). Forensic  
8 assays for BGAI among intracontinental eastern Eurasians were previously conducted mainly based on  
9 the SNPs or InDels. Microhaplotypes, as a set of closely linked SNPs within 200 base pairs, possess the  
10 advantages of both STR and SNP and have great potential in forensic ancestry inference. However, the  
11 developed forensic assay based on the ancestry informative microhaplotypes in the BGAI remained to  
12 be comprehensively explored, especially in China with enriching genetic diversity. Here, we described  
13 a new BGAI panel based on 21 novel identified ancestry informative microhaplotypes that focused on  
14 dissected finer-scale ancestry composition of Chinese populations. We initially screened all possible  
15 microhaplotypes with high  $F_{st}$  values among five East Asian populations and finally employed 21  
16 candidate microhaplotypes in two multiplex SNaPshot assays. Forensic amplification efficiency and  
17 statistically/physically phased haplotypes of the 21 microhaplotypes were validated using both  
18 SNaPshot and massively parallel sequencing (MPS) platforms. Followingly, we validated the efficiency  
19 of these microhaplotypes for BGAI in 764 individuals from ten Chinese populations. Fine-scale  
20 ancestry source and ancestry proportion estimated by the principal component analysis (PCA),  
21 multidimensional scaling (MDS), phylogenetic tree and model-based STRUCTURE among worldwide  
22 populations and East Asians showed that our customized panel could provide a higher discrimination  
23 resolution in both continental population stratification and East Asian regional substructure. East Asian  
24 populations could be further classified into linguistically/geographically different intracontinental  
25 subpopulations (Tibeto-Burman, Tai-Kadai and others). Finally, we obtained a higher estimated  
26 accuracy using training and tested datasets in the microhaplotype-based panel than traditional  
27 SNP-based panels. Generally, the above results demonstrated that this microhaplotype panel was robust  
28 and suitable for forensic BGAI in Chinese populations, which not only provided a high discriminatory  
29 power for continental populations but also discriminated East Asians into linguistically restricted  
30 subpopulations.

31  
32 **Keywords:** Microhaplotypes; Ancestry inference; Population structure; Chinese subpopulations;  
33 Forensic genetics

34

## 35 **1. Introduction**

36 DNA profiling with sets of highly polymorphic autosomal short tandem repeat (STR) has been  
37 applied in forensic investigations and has become the mainstream technology in recent years [1-3]. A  
38 profile match will provide strong evidence for police investigations. However, the traditional STR  
39 method cannot identify the suspects anymore when the profile mismatch. Investigating more valuable  
40 information from biological materials found at crime scenes to provide more accurate and reliable  
41 guidance for case investigation has now been a new challenge in forensic research. While the  
42 biogeographic ancestry information can be inferred through detecting ancestry informative markers  
43 (AIMs) of the biological samples, which will provide clues for determining the investigation direction  
44 and narrowing the investigation scope. This forensic application was regarded as the forensic  
45 biogeographic ancestry inference (BGAI). AIMs are markers that show strong allele frequency  
46 differences between populations from different geographic regions or ethnically restricted groups and  
47 can be used for determining the probable biogeographic ancestry of an individual [1,2,4,5]. Studies of  
48 BGAI have been constructed based on different AIMs, including STR [6], single nucleotide  
49 polymorphism (SNP) [7-9] and insertion/deletion polymorphism (InDel) [10-12]. In addition to the  
50 traditional AIMs, microhaplotype has become an important part of forensic ancestry inference research  
51 in recent years [13,14]. Microhaplotypes, the new genetic markers with two or more closely linked  
52 SNPs within 200bp DNA fragment, have the advantages of both STR and SNP and have great  
53 application potential in forensic analysis [13-17]. Microhaplotype sets have been developed for  
54 forensic ancestry inference, but most of them only focused on inferring ancestry information at the  
55 level of intercontinental [13, 17-20]. In recent years, researchers have focused on studies of ancestry  
56 inference within intracontinental populations, such as Europe, Southwest Asia [21-23].

57 China is a large multiethnic country with highly heterogeneous genetic origins and a complex  
58 population admixture and evolutionary history. Genetic evidence inferred from the STR, SNP, InDel in  
59 the autosomal, X/Y-chromosomes has demonstrated that China with massive ethnolinguistic diversity  
60 harbored multiple genetic diversity [24-28]. Recent genetic analyses based on the genome-wide SNP  
61 data have revealed the obvious fine-scale population stratifications among the populations from  
62 different language families, such as significant genetic differences were identified between  
63 Sinitic-speaking Han Chinese and Tungusic/Mongolic/Turkic people in the north [29], Tibeto-Burman  
64 people in the southwest [30], and Tai-Kadai, Hmong-Mien, Austronesian and Austroasiatic speakers in  
65 the south [31]. Although these aforementioned genetic substructures of Chinese populations have been  
66 characterized through SNPs [32], the atlas of the genetic structures of Chinese populations are not fully  
67 understood and need further investigation to shed light the fine-scale structures for forensic purposes.  
68 To our knowledge, genetic differentiation among intracontinental populations identified via  
69 traditionally forensic panels (SNPs, STRs, InDels and others) is limited, even the AIMs included in the  
70 Precision ID ancestry panel [33-36].

71 Therefore, we sought to screened out ancestry informative microhaplotypes for intracontinental  
72 population substructure inference. Forty-four markers were screened from five East-Asian populations  
73 in the 1000 Genomes Project [37], and then a small sample set (200 individuals) was used to test the

74 efficacy of these loci. Based on the preliminary results, we selected 21 microhaplotypes and  
75 constructed two SNaPshot-based panels for typing 764 unrelated individuals from 10 linguistically and  
76 geographically different populations. Meanwhile, we designed a massively parallel sequencing (MPS)  
77 panel to validate the robustness and reliability of the statistically reconstructed phased haplotypes  
78 (PHASE software). Subsequently, populations data from 1000 Genomes Phase 3 were collected and  
79 merged with our newly-generated data set to evaluate the efficiency of forensic ancestry inference  
80 using these 21 microhaplotype markers. Comprehensive population comparison analyses were  
81 performed using different population genetic statistical methods to assess the effectiveness of the 21  
82 loci for substructure discrimination of worldwide continental populations and regional restricted  
83 populations. Finally, we performed the ancestry assignment tests using Snipper to evaluate the ancestry  
84 assignment capability of this microhaplotype panel.

85

## 86 **2. Material and methods**

### 87 *2.1 Sample preparation*

88 Peripheral blood samples were collected from unrelated individuals after receiving written  
89 informed consent. The present study was approved by the Ethics Committee at the Institute of Forensic  
90 Medicine, Sichuan University (Approval Number: K2019017), and all the procedures were performed  
91 under the standards of the Declaration of Helsinki [38]. A total of 764 samples were collected from ten  
92 Chinese populations, including 74 Chengdu Hans, 76 Dujiangyan Tibetans, 77 Muli Tibetans, 78  
93 Xichang Yis, 78 Wuzhong Huis, 63 Zunyi Gelaos, 78 Hainan Lis, 80 Hainan Hans, 73 Ordos  
94 Mongolians and 87 Tibet Sherpas. The geographic map of studied populations is shown in **Fig. S1**. All  
95 participants shared no biologically close relationships with each other and all of them were required to  
96 be aboriginal inhabitants and no marriage with other ethnic groups for at least three generations.

97 Genomic DNA was extracted using the Purelink Genomic DNA Mini Kit (Thermo Fisher  
98 Scientific) and quantified by the NanoDrop-1000 spectrophotometer (Thermo Fisher Scientific)  
99 according to the manufacturer's recommendations. The genomic DNA was diluted to 2 ng/ $\mu$ l and stored  
100 at -20°C until amplification.

101

### 102 *2.2 Screening and selection of microhaplotypes*

103 The 1000 Genomes Project (<https://www.ncbi.nlm.nih.gov/variation/tools/1000genomes/>) were  
104 used for SNP screening. The following inclusion criteria were used for initial genotyping on the small  
105 sample set: (1) candidate SNPs loci with  $F_{st} > 0.1$  among the five East-Asian populations (Southern  
106 Han Chinese, China, CHS; Han Chinese in Beijing, China, CHB; Chinese Dai in Xishuangbanna,  
107 China, CDX; Kinh in Ho Chi Minh City, Vietnam, KHV; and Japanese in Tokyo, Japan, JPT) were  
108 filtered using VCFtools [39]; (2) The physical distance between the two SNPs in one microhaplotype is  
109 within 200bp and linkage disequilibrium values between the two SNPs ( $r^2$  values) larger than 0.6 [40];  
110 (3) each microhaplotype has at least three haplotypes and all of the haplotypes corresponding minimum  
111 frequencies were larger than 0.1; (4) The physical distance among microhaplotypes located on the same  
112 chromosome needs to be greater than 20 Mb. According to the above criteria, 44 microhaplotypes were

113 preliminarily screened out. And then the 44 microhaplotypes were further verified and re-screened by  
114 testing a small number of samples from ten Chinese populations (20 samples from each population) to  
115 find out loci that were suitable for ancestry inference of East-Asian populations. Finally, 21 new  
116 microhaplotypes were screened out. The nomenclature of microhaplotypes was in accordance with  
117 Kidd's proposal [41].

118

### 119 *2.3 Genotyping and Phasing: SNaPshot and PHASE*

120 The PCR primers were designed with the Primer Premier 6.0 [42]. The SBE primers designing  
121 was conducted with the SBE primer program [43] and all the SBE primers were tailed at the 5'-end  
122 with a poly-GCCTCC(TCCC)<sub>n</sub> sequence to separate SBE products. All the primers were evaluated for  
123 secondary structure and specificity using AutoDimer [44] and NCBI primer blast, respectively. The  
124 PCR primers and SBE primers were synthesized by Thermo Fisher Scientific and purified with  
125 polyacrylamide gel electrophoresis (PAGE) and HPLC, respectively. The PCR primers and SBE  
126 primers of the final 21 microhaplotypes are shown in **Table S1** and **Table S2**.

127 The PCR reaction was performed in a single PCR multiplex reaction with a total volume of 10  $\mu$ l,  
128 which included 5  $\mu$ l of QIAGEN Multiplex PCR Master Mix, 1  $\mu$ l of primer mixture, 1  $\mu$ l of genomic  
129 DNA, and 3  $\mu$ l of RNase free water. PCR was conducted on the ProFlex 96-Well PCR System (Thermo  
130 Fisher Scientific). Thermal cycling conditions consisted of an initial step at 95  $^{\circ}$ C for 15 min, followed  
131 by 30 cycles at 94  $^{\circ}$ C for 30 s, 50 - 60  $^{\circ}$ C for 90 s, and 72  $^{\circ}$ C for 30 s, and a final extension at 72  $^{\circ}$ C for 10  
132 min. After the PCR reaction and before the multiplex SBE reactions, in order to remove the remaining  
133 primers and nucleotides, we added 2.5  $\mu$ l of NEB Shrimp Alkaline Phosphatase (SAP) and 0.5  $\mu$ l of  
134 NEB Exonuclease I (EXO I) to 5  $\mu$ l of PCR products. The mixture was incubated at 37  $^{\circ}$ C for 60 min  
135 and then incubated at 80  $^{\circ}$ C for 15 min. Subsequently, the multiplex SBE reactions were performed  
136 using the SNaPshot Multiplex kit (Thermo Fisher Scientific) according to the manufacturer's  
137 instructions. 1.5  $\mu$ l of SNaPshot Multiplex Ready Reaction Mix, 0.5  $\mu$ l of SBE premixed primers, 1.5  
138  $\mu$ l of purified PCR product and 1.5  $\mu$ l of RNase free water were mixed in a total volume of 5  $\mu$ l. The  
139 SBE reactions were conducted according to the following conditions: 25 cycles at 96  $^{\circ}$ C for 10 s, 50  $^{\circ}$ C  
140 for 5 s, and 60  $^{\circ}$ C for 30 s. The SBE reaction was performed on the ProFlex 96-Well PCR System. To  
141 purify the extension products, 1  $\mu$ l of SAP was added to 5  $\mu$ l of extension products and incubated at 37  $^{\circ}$ C  
142 for 60 min, followed by incubation at 80  $^{\circ}$ C for 15 min. The purified products were separated and  
143 detected by capillary electrophoresis (CE) using the ABI 3130 Genetic Analyzer with POP-7 polymer  
144 and GeneScan-120 Liz (Thermo Fisher Scientific). The raw data were analyzed using the GeneMapper  
145 ID V3.2 software (Thermo Fisher Scientific). The results of haplotype and corresponding frequencies  
146 were estimated by the PHASE version 2.1.1 [45,46]. To assess the sensitivity of the developed SBE  
147 panels, a dilution series of template DNA (2 ng, 1ng, 0.5 ng, 0.25 ng, 0.125 ng and 0.0625ng) were  
148 amplified and detected in triplicate.

149

### 150 *2.4 Microhaplotype profiling: massively parallel sequencing (MPS)*

151 MPS technology can obtain haplotype data unambiguously in a single-strand read across the

152 entire locus [13]. To verify the accuracy of the phasing results using PHASE, 119 samples were  
153 sequencing by MPS technology. 21 microhaplotype sequence targets were submitted to Thermo Fisher  
154 Scientific Ion AmpliSeq Designer (<http://www.ampliseq.com>) in the form of a BED file (Ampliseq ID:  
155 IAD206421). The design type was a single-pool DNA Hotspot design with an amplicon length of  
156 125-375 bp. The Precision ID Library Kit (Thermo Fisher Scientific) was adopted to prepare the DNA  
157 library based on the manufacturer's instructions. After the thermal cycling reaction, we used 2  $\mu$ l of  
158 FuPa Reagent to digest the extra primers in the library products. We added the Switch Solution, diluted  
159 barcode adapter mix and DNA ligase successively to add the ligation according to the recommended  
160 incubation conditions. After ligation, the Agencourt AMPure XP Reagent (Beckman Coulter) was used  
161 to purify the SNP libraries. And then we quantified the obtained libraries using the Ion Library TaqMan  
162 Quantitation Kit (Thermo Fisher Scientific) and normalized them to 30 pM. We pooled the libraries in  
163 equal volumes for template preparation. The automated template preparation was conducted based on  
164 the Ion Chef System (Thermo Fisher Scientific). Subsequently, we used the Ion S5 XL System and Ion  
165 530 chip to sequencing all the microhaplotypes. All raw data were processed with Torrent Suite  
166 software V.5.2.2 (Thermo Fisher Scientific), Varianter Plugin V5.2.1.38 (Thermo Fisher Scientific) and  
167 Coverage Analysis Plugin V5.2.1.2 (Thermo Fisher Scientific). The BAM files and BAI files were  
168 verified using IGV V2.3.97 [47].

169

#### 170 *2.5 Data merging and statistical analysis*

171 The online tool of STRAF [48] was used to evaluate the forensic statistical parameters, including  
172 haplotype frequencies, the power of discrimination (PD), probability of matching (PM), power of  
173 exclusion (PE), observed heterozygosity ( $H_o$ ) of the 21 microhaplotypes. The Hardy-Weinberg  
174 equilibrium (HWE) and Linkage Disequilibrium (LD) were estimated using the Arlequin v3.5 [49].  
175 Pairwise  $F_{st}$  among ten studied populations based on raw genotyped data were also calculated using the  
176 Arlequin v3.5. Nei's standard genetic distances based on the allele frequency spectrum were computed  
177 using the PHYLIP v3.6.7 [50]. Principal component analysis (PCA) and multidimensional scaling  
178 (MDS) were conducted using the IBM SPSS 23 [51] based on allele frequency and genetic distance,  
179 respectively. Phylogenetic trees were established applying the neighbor-joining method using MEGA  
180 V.7.0 [52]. Model-based clustering analysis was carried out using the STRUCTURE v2.3.4 [53] with  
181 admixture model and correlated frequencies to evaluate the ancestry inference ability of the 21 loci  
182 among the ten populations. We ran STRUCTURE from  $K = 2$  to 7. Each  $K$  was run 5 times with  
183 100,000 burn-ins and 100,000 Markov Chain Monte Carlo (MCMC) iterations. CLUMPP version  
184 1.1.222 [54] and Distruct version 1.1.23 [55] were used to visualize the STRUCTURE results.

185 To assess the population genetic relationships among worldwide populations, we collected the  
186 population data of 26 populations from the 1000 Genome Project and merged it with our  
187 newly-generated population data from ten Chinese populations as the final dataset for the efficiency  
188 evaluation of the worldwide and regional ancestry inference and population genetic analyses.  
189 Population genetic analyses among the 36 populations were performed using PCA, MDS and  
190 neighbor-joining tree, respectively. The population genetic structure was also conducted using the

191 model-based STRUCTURE (K values were set 2 to 8). In addition, ancestry assignments were also  
192 performed to evaluate the performance of this inference system with the 21 microhaplotype loci using  
193 Snipper 2.5, and 30 of 764 studied individuals were randomly collected as blind trials to estimate their  
194 ancestry affiliation.

195

## 196 *2.6 Quality control*

197 Control DNA 9947A (Thermo Fisher Scientific) and RT-PCR Grade Water (Thermo Fisher  
198 Scientific) were used as positive and negative controls for each batch of genotyping, respectively. All  
199 experiments were performed at the Forensic Genetics Laboratory of the Institute of Forensic Medicine,  
200 Sichuan University, which is an accredited laboratory (ISO 17025), in accordance with quality control  
201 measures. The laboratory has also been accredited by the China National Accreditation Service for  
202 Conformity Assessment (CNAS).

203

## 204 **3. Results**

### 205 *3.1 Construction of SNaPshot panels*

206 44 candidate microhaplotypes were screened out preliminary from the 1000 Genome dataset.  
207 After excluding loci that with small differences in the allele frequencies distribution ( $F_{st} < 0.05$ ) among  
208 the small number of samples (200 samples from ten populations) and eliminating some loci that cannot  
209 get stable results via experimental validations, we finally obtained 21 novel microhaplotypes to  
210 develop the assay for forensic ancestry inference. The 21 microhaplotypes were distributed on 12  
211 different autosomal chromosomes and the detailed information is listed in **Table 1**. The molecular  
212 lengths of the 21 markers ranged from 8 bp (mh03HYP06) to 151 bp (mh08HYP23) with an average of  
213 59 bp, which indicated that these loci might be useful for degraded samples. The electropherogram of  
214 the two SNaPshot assays from a reference sample is shown in **Fig. S2**. Serial dilutions of Control DNA  
215 9947A and a reference sample were prepared in triplicate to determine the minimum amount of input  
216 DNA. The panel 1 can detect the expected peak when input DNA  $\geq 0.0625$  ng, and the panel 2 can  
217 only detect the expected peak with input DNA not lower than 0.125 ng and the genotype was  
218 incomplete at 0.0625 ng.

219

### 220 *3.2 Validation of the results of genotyping and phasing using MPS*

221 Genotyping by SNaPshot and phasing by PHASE were validated through MPS. 119 samples (11  
222 Chengdu Hans, 16 Dujiangyan Tibetans, 11 Muli Tibetans, 11 Xichang Yis, 13 Wuzhong Huis, 11  
223 Zunyi Gelaos, 11 Hainan Lis, 12 Hainan Hans, 13 Ordos Mongolians and 10 Tibet Sherpas) were used  
224 to sequence the 21 microhaplotypes. All the haplotype results estimated by PHASE were in accordance  
225 with the sequencing data based on the Ion S5 XL System. These consistent results indicated that  
226 genotyping microhaplotypes of SNP-SNP using the method of SNaPshot combined with PHASE is  
227 accurate and feasible.

228

229 *3.3 Haplotype frequency distribution and forensic parameters*

230 We successfully genotyped 21 microhaplotypes in 764 individuals from ten Chinese populations  
231 and observed 65 different haplotypes in this study. The haplotype frequency distributions of the 21 loci  
232 in the investigated populations are shown in **Table S3**. The corresponding haplotype frequencies  
233 ranged from 0.0135 (mh09HYP24) to 0.7568 (mh07HYP19) in Chengdu Han, 0.0066 (mh03HYP06)  
234 to 0.8026 (mh20HYP42) in Dujiangyan Tibetan, 0.0065 (mh09HYP24) to 0.7857 (mh03HYP06) in  
235 Muli Tibetan, 0.0064 (mh09HYP24) to 0.8333 (mh08HYP22) in Xichang Yi, 0.0079 (mh09HYP24) to  
236 0.8413 (mh08HYP22) in Zunyi Gelao, 0.0064 (mh03HYP06) to 0.7308 (mh07HYP19) in Wuzhong  
237 Hui, 0.0063 (mh09HYP24) to 0.8333 (mh07HYP19) in Hainan Han, 0.0064 (mh03HYP09) to 0.9103  
238 (mh08HYP22) in Hainan Li, 0.0068 (mh09HYP24) to 0.8493 (mh20HYP42) in Ordos Mongolian, and  
239 0.0115 (mh03HYP09) to 0.9023 (mh11HYP28) in Tibet Sherpa. The haplotype frequency distribution  
240 elaborated a large deviation among the ten populations. For example, mh03HYP09 and mh06HYP18  
241 illustrated that distributions of each haplotype in the ten groups were strikingly different (**Fig. S3**). No  
242 significant deviation from Hardy-Weinberg disequilibrium and LD was observed among the 21 loci in  
243 the ten ethnic groups after Bonferroni correction. The forensic statistical parameters including PM, PD,  
244 PIC, Ho, PE and TPI were calculated in each of investigated populations and are presented in **Table**  
245 **S4-S13**, respectively. The Ho values of the 21 loci in the ten populations ranged from 0.0897  
246 (mh07HYP19) in Hainan Li to 0.9310 (mh05HYP14) in Tibet Sherpa with an average value of 0.5216.  
247 The cumulative discrimination power (CDP) of the 21 loci spanned from 0.999999999576658 in  
248 Hainan Li to 0.9999999999733 in Wuzhong Hui in this study.

249

250 *3.4 Pairwise  $F_{st}$  and Nei's genetic distance*

251 The pairwise  $F_{st}$  values among the investigated populations according to genotype data were  
252 calculated and listed in **Table S14**. The smallest  $F_{st}$  value was observed between Chengdu Han and  
253 Zunyi Gelao (0.0044), while the largest  $F_{st}$  was found between Tibet Sherpa and Hainan Li (0.0994).  
254 Nei's genetic distances based on the allele frequency distribution were computed to validate and  
255 confirm the population's genetic diversity. As shown in **Table S15**, similar results were obtained. The  
256 Nei's genetic distances varied from 0.0109 (between Chengdu Han and Zunyi Gelao) to 0.2271  
257 (between Hainan Li and Tibet Sherpa).

258 To explore the worldwide population's genetic diversity, we also estimated pairwise  $F_{st}$  and Nei's  
259 genetic distance among 36 worldwide populations (**Table S16-S17**). The largest Nei's genetic distance  
260 was observed between Mende in Sierra Leone (MSL) from Africa and Tibet Sherpa from Asia (0.4890),  
261 while the smallest genetic distance was found between Yoruba in Ibadan (YRI) and Esan in Nigeria  
262 (ESN) from Africa (0.0036). Both  $F_{st}$  and Nei's genetic distance revealed that significant genetic  
263 distinction existed among intercontinental populations, while close genetic distances exist among  
264 intracontinental populations.

265

266 *3.5 Phylogenetic relationship reconstruction and multidimensional scaling analysis*

267 To further investigate genetic relationships among the investigated populations and worldwide

268 populations, neighbor-joining algorithm and multidimensional scaling analysis were conducted on the  
269 basis of Nei's genetic distance matrixes, respectively. In **Fig. 1A**, the neighbor-joining tree of the  
270 studied populations presents two main clusters, the Hainan Li and Hainan Han in one branch and the  
271 other populations clustered as another main cluster. In the main cluster, Tibeto-Burman-speaking  
272 groups (Xichang Yi, Muli Tibetan, Dujiangyan Tibetan and Tibet Sherpa) were found to cluster with  
273 each other. The neighbor-joining tree of 36 worldwide populations presents five clusters: East-Asian  
274 cluster, South-Asian cluster, African cluster, American cluster and European cluster (**Fig. 2A**). The  
275 results of MDS are presented in **Fig. 1B**, Hainan Li was alone in the upper right of the first quadrant,  
276 while Hainan Han and Chengdu Han were located close to each other at the lower left. The four  
277 Tibeto-Burman-speaking groups of Xichang Yi, Muli Tibetan, Dujiangyan Tibetan and Tibet Sherpa  
278 were all in the third quadrant of the coordinate axis. Ordos Mongolian and Zunyi Gelao were in the  
279 second and fourth quadrants, respectively. In the MDS of the worldwide populations (**Fig. 2B**), the 36  
280 populations were grouped into three groups: African groups, East-Asian groups as well as European,  
281 South-Asian and American groups. African populations were clustered in the lower-left corner,  
282 European, South-Asian and American populations were clustered in the middle of the coordinate, and  
283 East-Asian populations were distributed on the right side of the Y-axis.

284

### 285 *3.6 Principal components analysis*

286 Principal components analysis was conducted based on the allele frequency distribution to assess  
287 the population genetic differentiation among the studied and worldwide populations. The first three  
288 principal components of the ten studied populations defined 96.5 % of the total genetic variance (PC1:  
289 85.9%, PC2: 8.7%, PC3: 1.9%). The first three principal components presented in **Fig. 1C** and **Fig. 1D**  
290 can clearly differentiate Hainan Li and Hainan Han from others. **Fig. 1C** was constructed on the basis  
291 of the first two components, and a clear separation between Hainan Li, Hainan Han and other  
292 populations was observed. PC1 separated Hainan Li and Hainan Han from the others, and PC2  
293 separated Hainan Li, Hainan Han, Chengdu Han and Zunyi Gelao from the others. In the plot of PC1  
294 and PC3 (**Fig. 1D**), Ordos Mongolian, Wuzhong Hui and Dujiangyan Tibetan were located in the first  
295 quadrant. Hainan Li and Hainan Han were separated from each other in the third quadrant. In the PCA  
296 plots of 36 worldwide populations (**Fig. 2C** and **Fig. 2D**), the first three principal components can  
297 clearly differentiate African populations, Asian populations, as well as European, South Asian and  
298 American populations. Although European, South Asian, and American populations clustered in the  
299 middle of the coordinate, there were also some genetic differences among each other. PCA results  
300 based on allele frequency were similar to the results of MDS on the basis of genetic distance.

301

### 302 *3.7 Population structures and individual ancestry components*

303 A Bayesian clustering procedure among the ten Chinese populations was conducted using a  
304 model-based STRUCTURE algorithm based on genotype data (**Fig. 3**). At  $K = 2$ , two ancestral  
305 components could be identified. The two principal ancestral components dominate in Hainan Li and  
306 Tibet Sherpa, respectively. At  $K=3$ , a Hainan-Li-dominant ancestry component can be identified in



307 populations from Hainan and a Tibetan-dominant ancestry component can be observed in  
308 Tibeto-Burman-speaking populations. Besides, another ancestry component dominated in Wuzhong  
309 Hui and Ordos Mongolian was also found. At  $K = 4$  (the optimal  $K$  value), the genetic structure was  
310 split by four ancestry components, and Hainan Li, Tibet Sherpa, Wuzhong Hui and Chengdu Han  
311 possessed obviously distinct genetic components. With the increase of the  $K$  value, the distinction  
312 among the sub-populations was separated more clearly. New different ancestral components were  
313 continuously separated in the studied populations, while Hainan Li was still composed of only one  
314 dominant ancestral component. STRUCTURE was also performed to explore ancestry components  
315 among the 36 worldwide populations. **Fig. S4** showed the analysis results of STRUCTURE with  $K =$   
316 2-8. At  $K = 2$ , two distinct ancestry components were identified: originating from African and  
317 non-African. At  $K = 4$ , the 36 populations were grouped into four clusters (African, East-Asian,  
318 South-Asian as well as European and American clusters) according to their ancestry components,  
319 among which Europeans and Americans were composed of two different ancestry components with  
320 different proportions. With the  $K$  value increased, the specific ancestry components of different  
321 continental populations were shown. At  $K = 6$ , African, East-Asian, South-Asian, European and  
322 American populations were composed of corresponding specific ancestry components, while two  
323 clearly different ancestry components were observed in East-Asian populations. At  $K = 7$ , the genetic  
324 structure of East-Asians was split into three distinct ancestry components.

325 Finally, to assess the ancestry assignment performance of the 21 microhaplotypes in Chinese  
326 subgroups, we performed an ancestry assignment test using the Snipper  
327 (<http://mathgene.usc.es/snipper/index.php>). A training set (734 individuals from studied populations)  
328 and a test set (the remaining 30 individuals from studied populations) were employed. All the test  
329 samples were assigned into a most probable population with a list of the resulting likelihood in  
330 descending order and the predicted admixtures were also provided. **Table S18** showed the results of the  
331 likelihood of all the test samples. In the results of the ancestry prediction test, all the test samples from  
332 Hainan Li, Xichang Yi, Zunyi Gelao, Tibet Sherpa and Wuzhong Hui were accurately predicted to the  
333 corresponding real population origin. Two individuals from Hainan Han, one from Chengdu Han, one  
334 from Dujiangyan Tibetan, two from Muli Tibetan and two from Ordos Mongolian were incorrectly  
335 assigned. Although the 8 samples were misclassified as other ethnic groups in neighboring areas or the  
336 same ethnic group in different geographical locations, the first three source groups in the list of  
337 ancestry probabilities results were all contained their real population sources (**Table S18**).

338

#### 339 **4. Discussion**

340 The ancestry inference of subgroups within a continent is much more difficult than ancestry  
341 inference between continents. In order to improve the efficiency of ancestry inference in Chinese  
342 subpopulations, we first screened microhaplotype markers based on frequencies distribution among  
343 East Asian populations in the 1000 Genomes Project [37]. Owing to the limited East Asian populations  
344 in the 1000 Genomes Project, only 44 microhaplotypes were screened out. These loci were further  
345 verified and rescreened via 200 samples from different Chinese populations to select suitable loci for

346 ancestry inference of East Asian populations. 21 microhaplotypes with significant population  
347 distribution differences in ten Chinese subpopulations were finally screened out. The population data  
348 showed that all microhaplotypes had high polymorphisms among the ten subpopulations, with the  
349 cumulative discrimination power spanned from 0.999999999576658 (Hainan Li) to 0.9999999999733  
350 (Wuzhong Hui), which indicated that the loci have good application potential in forensic individual  
351 identification.

352 In order to evaluate the ancestry inference efficiency of the 21 loci in Chinese subgroups and to  
353 explore the genetic relationship among these populations, the pairwise genetic distances ( $F_{st}$  and Nei's  
354 genetic distance) were calculated based on raw genotype data and frequency data, respectively.  
355 Moreover, PCA, MDS, phylogenetic analysis and STRUCTURE analysis were conducted to explore  
356 the fine-scale population structure and validate the discriminative power of this new-developed panel  
357 for regional populations. The results of pairwise genetic distances and neighbor-joining trees showed  
358 that the Hainan Li and Tibet Sherpa could be completely separated from other studied populations. This  
359 identified population genetic differentiation between Tai-Kadai-speaking Li, Tibeto-Burman-speaking  
360 Sherpa and other reference populations was consistent with the recent reconstructed evolutionary and  
361 admixture history of these populations based on the genome-wide SNP data. He et al., [31] genotyped  
362 over 500,000 SNPs in Hainan Hlai and found these Tai-Kadai people harbored one genetically  
363 homogeneous ancestry, which can be used as the representative of the southern Chinese Tai-Kadai  
364 ancestry. Further demographic model based on the  $f$ -statistics showed that these people shared more  
365 ancestry with coastal Austronesian speaking Ami and Atayal in Taiwan island. Recent ancient DNA  
366 studies from Fujian and Guangxi also identified two dominant and different Neolithic ancestries  
367 (Guangxi ancestry and Fujian ancestry) that played an important role in shaping the patterns of modern  
368 genetic diversity of South China and Southeast Asia [56,57]. These genetic analyses showed the  
369 southern Chinese ancestry was one dominant ancestry component that needed to be discriminated from  
370 others via forensic assay and further provided ancestry inference clues for the forensic investigation.  
371 Indeed, our developed microhaplotype-based BGAI panel can successfully differentiate southern  
372 Chinese indigenous ancestry from others. Like the unique genetic ancestry identified in Li people,  
373 Sherpa-related ancestry was the other typical ancestry component dominant in the highland  
374 Tibeto-Burman-speaking populations in the core region of Tibetan Plateau in East Asia [58]. Population  
375 admixture history reconstruction based on modern and ancient SNP data showed the genetic  
376 differentiation between highland East-Asians and lowland East Asians [30], and these differentiated  
377 signatures were also captured by our customized panel. In our population genetic analyses, compared  
378 with other groups, Hainan Han had a closer genetic relationship with Hainan Li, and the genetic  
379 relationships among the three populations from the Tibetan-Yi corridor (Dujiangyan Tibetan, Muli  
380 Tibetan and Xichang Yi) were closer, which suggested that the genetic relationship is also related to the  
381 population geographic origin. These results are similar to the results of population genetic analysis  
382 based on other genetic markers, such as SNP [34] and InDel [59]. Similar results were also observed in  
383 PCA and MDS analysis. In the STRUCTURE analysis, when  $K$  was the optimal  $K$  value ( $K = 4$ ),  
384 Hainan Li was composed of a specific ancestral component, Dujiangyan Tibetan, Muli Tibetan,

385 Xichang Yi, Wuzhong Hui, Ordos Mongolian and Tibet Sherpa were all composed of three ancestry  
386 components in different proportions, while Chengdu Han, Hainan Han and Zunyi Gelao had four  
387 distinct ancestral components.

388 We also explored the genetic relationships among 36 worldwide populations using the 21 loci.  
389 The results of MDS showed that the 36 populations were divided into three international groups:  
390 African groups, East-Asian groups as well as American, European and South Asian gradient groups.  
391 The results of the phylogenetic analysis showed that the African and East Asian populations clustered  
392 into two major clusters, while American, European and South-Asian populations first clustered into  
393 three branches, and then clustered into a large cluster. PCA results were consistent with the results of  
394 MDS and neighbor-joining tree. In the STRUCTURE analysis, with the increase of K value, African,  
395 East-Asian, American, European, and South-Asian populations can be completely separated. At the  
396 same time, it was also found that Colombians from Medellin (CLM) and Puerto Ricans from Puerto  
397 Rico (PUR) from America showed an obvious mixture. In addition to being composed of Native  
398 American ancestry, there were also African, European and South-Asian ancestry components in CLM  
399 and PUR. Three main East-Asian ancestry components were found in East-Asian populations. Among  
400 them, KHV, Hainan Li and CDX were mainly composed of one East-Asian ancestry component. The  
401 Tibetan-Yi corridor groups (Xichang Yi, Muli Tibetan, Dujiangyan Tibetan), Ordos Mongolia,  
402 Wuzhong Hui and Tibet Sherpa were mainly composed of one other ancestry component, and JPT was  
403 made up of another separate ancestral component. The four Han populations (CHB, CHS, Chengdu  
404 Han and Hainan Han) and Zunyi Gelao were composed of a mixture of two ancestry components, in  
405 which the northern Han (CHB) and the southern Han (CHS, Chengdu Han and Hainan Han)  
406 populations had obvious north-south differences. This result is consistent with the research based on  
407 high-density SNPs [60]. The abovementioned results suggested that the 21 microhaplotypes not only  
408 have good discrimination efficiency in the ancestry inference of intercontinental populations but also in  
409 Chinese sub-populations.

410 For individual ancestry estimation, we used Snipper to analyze all test individuals. We randomly  
411 selected 30 samples from studied populations as blind test samples and the remaining samples as the  
412 training set. Eight samples were incorrectly predicted to other ethnic groups in neighboring areas or the  
413 same ethnic groups in different geographical locations. However, the first three source groups in the  
414 results all contained their true source groups. The mismatched results of the above eight samples are  
415 mainly related to two factors: the genetic structure of the sample source population and the  
416 discrimination efficiency of the genetic markers. When the genetic relationship between the sample  
417 source populations of the test set and the reference population of the training set is closer, the  
418 prediction bias is more likely to occur, and the requirements for the inference efficiency of the genetic  
419 markers is higher. Therefore, it is necessary to screen population-specific and high-resolution AIMs to  
420 improve ancestry inference efficiency. In general, the results of Snipper indicated that the 21  
421 microhaplotypes have good potential in ancestry inference of sub-populations in China.

422 Our study showed that these 21 microhaplotypes are promising ancestry informative markers and  
423 have great potential in ancestry inference of Chinese subpopulations and worldwide populations. We

424 also must admit that the efficiency of ancestry inference is limited, and more subpopulations need to be  
425 investigated and higher discrimination markers need to be explored in the future. Other limitations in  
426 this pilot project focused on the discrimination substructure of Chinese populations via ancestry  
427 informative microhaplotypes were the number of included markers, limited SNPs in one  
428 microhaplotype, discarding the potentials of other linked InDel or SNP-InDel markers, limited  
429 development of specific inference methods and reference databased construction with more  
430 linguistically and geographically different populations.

431

## 432 **5. Conclusion**

433 In this study, we developed and identified 21 novel microhaplotypes as ancestry informative  
434 markers, which revealed the powerful potential in ancestry inference. The 21 loci were detected  
435 through a SNaPshot and phase workflow and the results were validated using MPS. After the  
436 comprehensive analyses of PCA, MDS, neighbor-joining tree and STRUCTURE, results revealed that  
437 the 21 loci showed re high-performance for distinguishing populations from East-Asian, African,  
438 European, South-Asian and American. Furthermore, the 21 loci were valuable for population  
439 stratification in China, which can improve the performance in distinguishing closely resided  
440 subpopulations. The 21 microhaplotype-based panel can be used as an effective tool in forensic  
441 ancestry inference and population genetics.

442

## 443 **Declaration of competing Interest**

444 The authors declare that they have no conflict of interest.

445

## 446 **Acknowledgement**

447 This study was supported by grants from the National Natural Science Foundation of China  
448 (81871532 and 81501635) and the Opening Project of Key Laboratory of Evidence Science (China  
449 University of Political Science and Law), Ministry of Education (2021KFKT07). The funders had no  
450 role in study design, data collection and analysis, preparation of the manuscript, or decision to submit  
451 the manuscript for publication.

452

## 453 **References**

- 454 [1] M. Kayser, P. de Knijff, Improving human forensics through advances in genetics, genomics and  
455 molecular biology, *Nat. Rev. Genet.* 12 (2011) 179-192.
- 456 [2] M.A. Jobling, P. Gill, Encoded evidence: DNA in forensic analysis, *Nat. Rev. Genet.* 5 (2004)  
457 739-751.
- 458 [3] E. Hagelberg, I.C. Gray, A.J. Jeffreys, Identification of the skeletal remains of a murder victim by  
459 DNA analysis, *Nature* 352 (1991) 427-429.
- 460 [4] T.B. Mersha, Mapping asthma-associated variants in admixed populations, *Front. Genet.* 6 (2015)  
461 292.
- 462 [5] M.D. Shriver, R.A. Kittles, Genetic ancestry and the search for personalized genetic histories, *Nat.*

- 463 Rev. Genet. 5 (2004) 611-618.
- 464 [6] N.A. Rosenberg, J.K. Pritchard, J.L. Weber, H.M. Cann, K.K. Kidd, L.A. Zhivotovsky, et al.,  
465 Genetic structure of human populations, *Science* 298 (2002) 2381-2385.
- 466 [7] C. Phillips, A. Salas, J.J. Sanchez, M. Fondevila, A. Gomez-Tato, J. Alvarez-Dios, et al., Inferring  
467 ancestral origin using a single multiplex assay of ancestry-informative marker SNPs, *Forensic Sci. Int.*  
468 *Genet.* 1 (2007) 273-280.
- 469 [8] Y.L. Wei, L. Wei, L. Zhao, Q.F. Sun, L. Jiang, T. Zhang, et al., A single-tube 27-plex SNP assay for  
470 estimating individual ancestry and admixture from three continents, *Int. J. Legal Med.* 130 (2016)  
471 27-37.
- 472 [9] C.X. Li, A.J. Pakstis, L. Jiang, Y.L. Wei, Q.F. Sun, H. Wu, et al., A panel of 74 AISNPs: Improved  
473 ancestry inference within Eastern Asia, *Forensic Sci. Int. Genet.* 23 (2016) 101-110.
- 474 [10] N.P. Santos, E.M. Ribeiro-Rodrigues, A.K. Ribeiro-Dos-Santos, R. Pereira, L. Gusmão, A.  
475 Amorim, et al., Assessing individual interethnic admixture and population substructure using a  
476 48-insertion-deletion (INSEL) ancestry-informative marker (AIM) panel, *Hum. Mutat.* 31 (2010)  
477 184-190.
- 478 [11] R. Pereira, C. Phillips, N. Pinto, C. Santos, S.E. dos Santos, A. Amorim, et al., Straightforward  
479 inference of ancestry and admixture proportions through ancestry-informative insertion deletion  
480 multiplexing, *PLoS One* 7 (2012) e29684.
- 481 [12] Q. Lan, C. Shen, X. Jin, Y. Guo, T. Xie, C. Chen, et al., Distinguishing three distinct biogeographic  
482 regions with an in-house developed 39-AIM-InDel panel and further admixture proportion estimation  
483 for Uyghurs, *Electrophoresis* 40 (2019) 1525-1534.
- 484 [13] K.K. Kidd, A.J. Pakstis, W.C. Speed, R. Lagace, J. Chang, S. Wootton, et al., Current sequencing  
485 technology makes microhaplotypes a powerful new type of genetic marker for forensics, *Forensic Sci.*  
486 *Int. Genet.* 12 (2014) 215-224.
- 487 [14] F. Oldoni, K.K. Kidd, D. Podini, Microhaplotypes in forensic genetics, *Forensic Sci. Int. Genet.* 38  
488 (2019) 54-69.
- 489 [15] K.K. Kidd, W.C. Speed, Criteria for selecting microhaplotypes: mixture detection and  
490 deconvolution, *Investig. Genet.* 6 (2015) 1.
- 491 [16] J. Zhu M. Lv N. Zhou D. Chen Y. Jiang L. Wang et al., Genotyping polymorphic microhaplotype  
492 markers through the Illumina MiSeq platform for forensics, *Forensic Sci. Int. Genet.* 39 (2019) 1-7.
- 493 [17] P. Chen, W. Zhu, F. Tong, Y. Pu, Y. Yu, S. Huang, et al., Identifying novel microhaplotypes for  
494 ancestry inference, *Int. J. Legal Med.* 133 (2019) 983-988.
- 495 [18] O. Bulbul, A.J. Pakstis, U. Soundararajan, C. Gurkan, J.E. Brissenden, J.M. Roscoe, et al.,  
496 Ancestry inference of 96 population samples using microhaplotypes, *Int. J. Legal Med.* 132 (2018)  
497 703-711.
- 498 [19] K.K. Kidd, W.C. Speed, A.J. Pakstis, D.S. Podini, R. Lagace, J. Chang, et al., Evaluating 130  
499 microhaplotypes across a global set of 83 populations, *Forensic Sci. Int. Genet.* 29 (2017) 29-37.
- 500 [20] A. Kureshi, J. Li, D. Wen, S. Sun, Z. Yang, L. Zha, Construction and forensic application of 20  
501 highly polymorphic microhaplotypes, *R. Soc. Open. Sci.* 7 (2020) 191937.

- 502 [21] O. Bulbul, G. Filoglu, T. Zorlu, H. Altuncul, A. Freire-Aradas, J. Sochtig, et al., Inference of  
503 biogeographical ancestry across central regions of Eurasia, *Int. J. Legal Med.* 130 (2016) 73-79.
- 504 [22] O. Bulbul, W.C. Speed, C. Gurkan, U. Soundararajan, H. Rajeevan, A.J. Pakstis, et al., Improving  
505 ancestry distinctions among Southwest Asian populations, *Forensic Sci. Int. Genet.* 35 (2018) 14-20.
- 506 [23] C. Santos, C. Phillips, M. Fondevila, R. Daniel, R.A.H. van Oorschot, E.G. Burchard, et al.,  
507 Pacifiplex: an ancestry-informative SNP panel centred on Australia and the Pacific region, *Forensic Sci.*  
508 *Int. Genet.* 20 (2016) 71-80.
- 509 [24] H. Yao M. Wang X. Zou Y. Li X. Yang A. Li et al., New insights into the fine-scale history of  
510 western-eastern admixture of the northwestern Chinese population in the Hexi Corridor via  
511 genome-wide genetic legacy, *Mol. Genet. Genomics* 296 (2021) 631-651.
- 512 [25] M. Wang, G. He, X. Zou, J. Liu, Z. Ye, T. Ming, et al., Genetic insights into the paternal admixture  
513 history of Chinese Mongolians via high-resolution customized Y-SNP SNaPshot panels, *Forensic Sci.*  
514 *Int. Genet.* 54 (2021) 102565.
- 515 [26] M. Wang, G. He, S. Gao, F. Jia, X. Zou, J. Liu, et al., Molecular genetic survey and forensic  
516 characterization of Chinese Mongolians via the 47 autosomal insertion/deletion marker, *Genomics* 113  
517 (2021) 2199-2210.
- 518 [27] Y. Liu, J. Yang, Y. Li, R. Tang, D. Yuan, Y. Wang, et al., Significant East Asian Affinity of the  
519 Sichuan Hui Genomic Structure Suggests the Predominance of the Cultural Diffusion Model in the  
520 Genetic Formation Process, *Front. Genet.* 12 (2021) 626710.
- 521 [28] G.L. He, M.G. Wang, Y.X. Li, X. Zou, H.Y. Yeh, R.K. Tang, et al., Fine-scale north-to-south  
522 genetic admixture profile in Shaanxi Han Chinese revealed by genome-wide demographic history  
523 reconstruction, *J. Syst. Evol.* 2021, <https://doi.org/10.1111/jse.12715>.
- 524 [29] G. He, M. Wang, X. Zou, R. Tang, H.Y. Yeh, Z. Wang, et al., Genomic insights into the  
525 differentiated population admixture structure and demographic history of North East Asians, *bioRxiv.*  
526 2021:2021.07.19.452943, doi: <https://doi.org/10.1101/2021.07.19.452943>.
- 527 [30] Y. Liu, M. Wang, P. Chen, Z. Wang, J. Liu, L. Yao, et al., Combined Low-/High-Density Modern  
528 and Ancient Genome-Wide Data Document Genomic Admixture History of High-Altitude East Asians,  
529 *Front. Genet.* 12 (2021) 582357.
- 530 [31] G. He, Z. Wang, J. Guo, M. Wang, X. Zou, R. Tang, et al., Inferring the population history of  
531 Tai-Kadai-speaking people and southernmost Han Chinese on Hainan Island by genome-wide array  
532 genotyping, *Eur. J. Hum. Genet.* 28 (2020) 1111-1123.
- 533 [32] O. Libiger, N.J. Schork, A Method for Inferring an Individual's Genetic Ancestry and Degree of  
534 Admixture Associated with Six Major Continental Populations, *Front. Genet.* 3 (2013) 322.
- 535 [33] G. He, Z. Wang, M. Wang, T. Luo, J. Liu, Y. Zhou, et al., Forensic ancestry analysis in two  
536 Chinese minority populations using massively parallel sequencing of 165 ancestry-informative SNPs.  
537 *Electrophoresis* 39 (2018) 2732-2742.
- 538 [34] Z. Wang, G. He, T. Luo, X. Zhao, J. Liu, M. Wang, et al., Massively parallel sequencing of 165  
539 ancestry informative SNPs in two Chinese Tibetan-Burmese minority ethnicities, *Forensic Sci. Int.*  
540 *Genet.* 34 (2018) 141-147.

- 541 [35] T. Xie, C. Shen, C. Liu, Y. Fang, Y. Guo, Q. Lan, et al., Ancestry inference and admixture  
542 component estimations of Chinese Kazak group based on 165 AIM-SNPs via NGS platform, *J. Hum.*  
543 *Genet.* 65 (2020) 461-468.
- 544 [36] G. He, J. Liu, M. Wang, X. Zou, T. Ming, S. Zhu, et al., Massively parallel sequencing of 165  
545 ancestry-informative SNPs and forensic biogeographical ancestry inference in three southern Chinese  
546 Sinitic/Tai-Kadai populations, *Forensic Sci. Int. Genet.* 52 (2021) 102475.
- 547 [37] 1000 Genomes Project Consortium, A. Auton, L.D. Brooks, R.M. Durbin, E.P. Garrison, H.M.  
548 Kang, et al., A global reference for human genetic variation, *Nature* 526 (2015) 68-74.
- 549 [38] A. Nicogossian, O. Kloiber, B. Stabile, The Revised World Medical Association's Declaration of  
550 Helsinki 2013: enhancing the protection of human research subjects and empowering ethics review  
551 committees, *World Med. Health Policy* 6 (2014) 1-3.
- 552 [39] P. Danecek, A. Auton, G. Abecasis, C.A. Albers, E. Banks, M.A. DePristo, et al., The variant call  
553 format and VCFtools, *Bioinformatics* 27 (2011) 2156-2158.
- 554 [40] J.C. Barrett, B. Fry, J. Maller, M.J. Daly, Haploview: analysis and visualization of LD and  
555 haplotype maps, *Bioinformatics* 21(2005) 263-265.
- 556 [41] K.K. Kidd, Proposed nomenclature for microhaplotypes, *Hum. Genomics* 10 (2016-) 16.
- 557 [42] V.K. Singh, A.K. Mangalam, S. Dwivedi, S. Naik, Primer premier: program for design of  
558 degenerate primers from a protein sequence, *Biotechniques* 24 (1998) 318-319.
- 559 [43] L. Kaderali, A. Deshpande, J.P. Nolan, P.S. White, Primer-design for multiplexed genotyping,  
560 *Nucleic Acids Res.* 31 (2003) 1796-1802.
- 561 [44] P.M. Vallone, J.M. Butler, AutoDimer: a screening tool for primer-dimer and hairpin structures,  
562 *Biotechniques* 37 (2004) 226-231.
- 563 [45] M. Stephens, N.J. Smith, P. Donnelly, A new statistical method for haplotype reconstruction from  
564 population data, *Am. J. Hum. Genet.* 68 (2001) 978-989.
- 565 [46] M. Stephens, P. Scheet, Accounting for decay of linkage disequilibrium in haplotype inference and  
566 missing-data imputation, *Am. J. Hum. Genet.* 76 (2005) 449-462.
- 567 [47] H. Thorvaldsdottir, J.T. Robinson, J.P. Mesirov, Integrative Genomics Viewer (IGV):  
568 high-performance genomics data visualization and exploration, *Brief. Bioinform.* 14 (2013) 178-192.
- 569 [48] A. Gouy, M. Zieger, STRAF-A convenient online tool for STR data evaluation in forensic genetics,  
570 *Forensic Sci. Int. Genet.* 30 (2017) 148-151.
- 571 [49] L. Excoffier, H.E. Lischer, Arlequin suite ver 3.5: a new series of programs to perform population  
572 genetics analyses under Linux and Windows, *Mol. Ecol. Resour.* 10 (2010) 564-567.
- 573 [50] M.P. Cummings, PHYLIP (Phylogeny Inference Package), John Wiley & Sons, Inc., 2004.
- 574 [51] J. Hansen, Using SPSS for windows and macintosh: analyzing and understanding data, *Am.*  
575 *Statistician* 59 (1) (2005) 113.
- 576 [52] S. Kumar, G. Stecher, K. Tamura, MEGA7: Molecular Evolutionary Genetics Analysis Version 7.0  
577 for Bigger Datasets, *Mol. Biol. Evol.* 33 (2016) 1870-1874.
- 578 [53] G. Evanno, S. Regnaut, J. Goudet, Detecting the number of clusters of individuals using the  
579 software STRUCTURE: a simulation study, *Mol. Ecol.* 14 (2005) 2611-2620.

- 580 [54] M. Jakobsson, N.A. Rosenberg, CLUMPP: a cluster matching and permutation program for  
581 dealing with label switching and multimodality in analysis of population structure, *Bioinformatics* 23  
582 (2007) 1801-1806.
- 583 [55] N.A. Rosenberg, DISTRUCT: a program for the graphical display of population structure, *Mol.*  
584 *Ecol. Notes* 4 (2003) 137-138.
- 585 [56] T. Wang, W. Wang, G. Xie, Z. Li, X. Fan, Q. Yang, et al., Human population history at the  
586 crossroads of East and Southeast Asia since 11,000 years ago, *Cell* 184 (2021) 3829-3841.21.
- 587 [57] M.A. Yang, X. Fan, B. Sun, C. Chen, J. Lang, Y.C. Ko, et al., Ancient DNA indicates human  
588 population shifts and admixture in northern and southern China, *Science* 369 (2020) 282-288.
- 589 [58] M. Wang, W. Du, R. Tang, Y. Liu, X. Zou, D. Yuan, et al., Genomic history and forensic  
590 characteristics of Sherpa highlanders on the Tibetan Plateau inferred from high-resolution  
591 genome-wide InDels and SNPs, *bioRxiv* 2021:2021.06.23.449553.
- 592 [59] X. Zou, G. He, M. Wang, L. Huo, X. Chen, J. Liu, et al., Genetic diversity and phylogenetic  
593 structure of four Tibeto-Burman-speaking populations in Tibetan-Yi corridor revealed by  
594 insertion/deletion polymorphisms, *Mol. Genet. Genomic Med.* 8 (2020) e1140.
- 595 [60] S. Xu, X. Yin, S. Li, W. Jin, H. Lou, L. Yang, et al., Genomic dissection of population substructure  
596 of Han Chinese and its implication in association studies, *Am. J. Hum. Genet.* 85 (2009) 762-774.  
597



598 **Legends of Figures**

599 **Fig.1** Comprehensive population analyses based on 21 microhaplotypes among the studied populations.

600 (A) A phylogenetic tree among the ten populations based on the Nei's genetic distances. (B)

601 Multidimensional scaling analysis among the ten populations based on Nei's genetic distances. (C, D)

602 Principal component analysis based on the first three components among the ten populations. (C) The

603 plot of PC1 and PC2. (D) The plot of PC1 and PC3.

604

605 **Fig. 2** Comprehensive population analyses based on 21 microhaplotypes among 36 worldwide

606 populations. (A) A phylogenetic tree among 36 worldwide populations based on the Nei's genetic

607 distances. (B) Multidimensional scaling analysis among 36 worldwide populations based on Nei's

608 genetic distances. (C, D) Principal component analysis based on the first three components among 36

609 worldwide populations. (C) The plot of PC1 and PC2. (D) The plot of PC1 and PC3.

610

611 **Fig. 3** Summary plot of genetic structure among 10 Chinese populations.

612

613

614 **Fig. S1** The map showing the geographical location of the investigated Chinese populations.

615

616 **Fig. S2** The electropherogram of the two SNaPshot assays from a reference sample.

617

618 **Fig. S3** Haplotype frequency distributions of mh03HYP09 and mh06HYP18 in the ten investigated

619 populations in China.

620

621 **Fig. S4** Summary plot of genetic structure among 36 worldwide populations.

622

**A**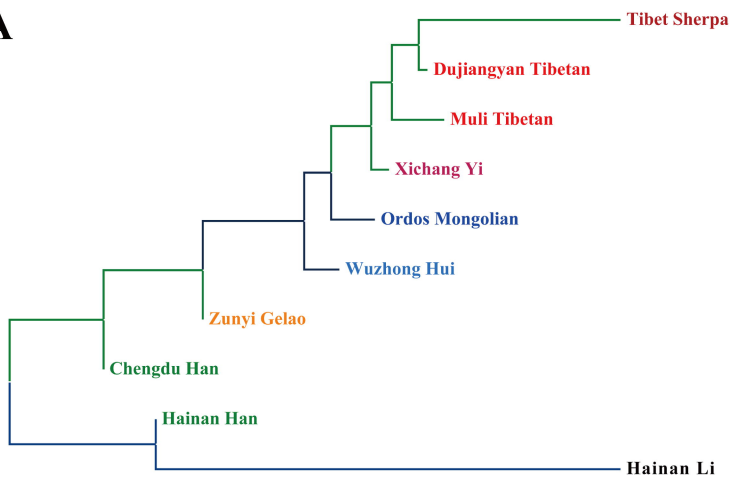**B**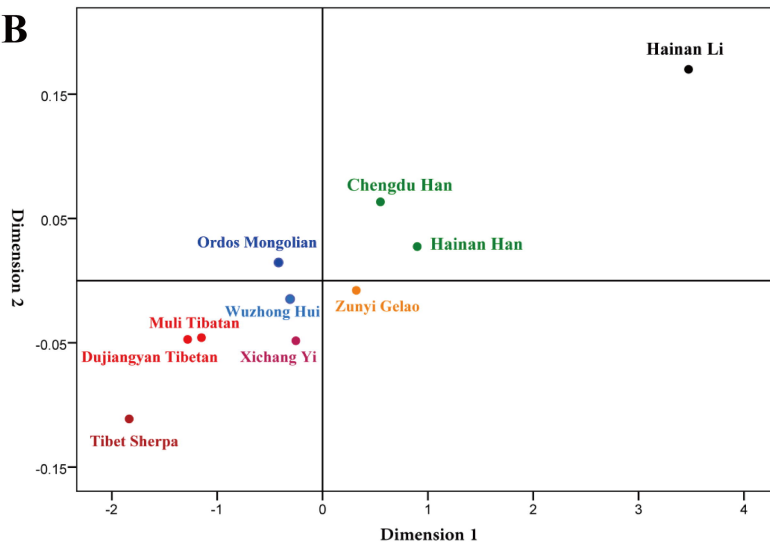**C**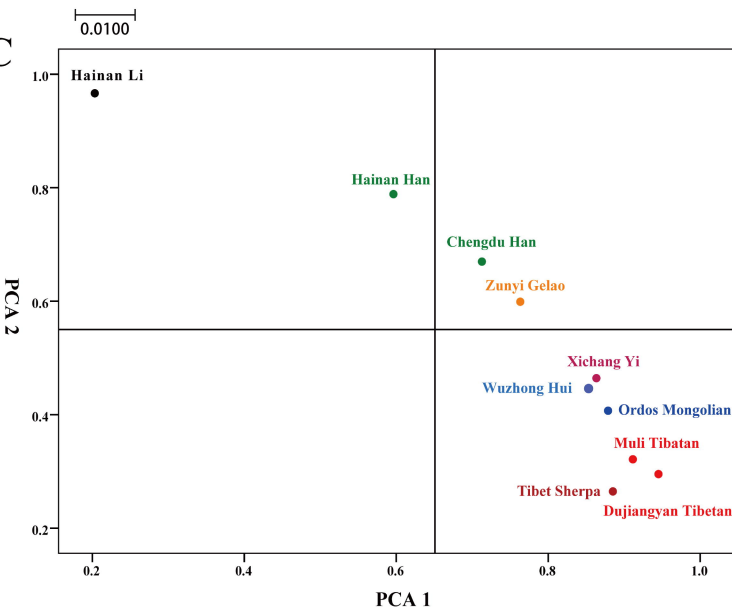**D**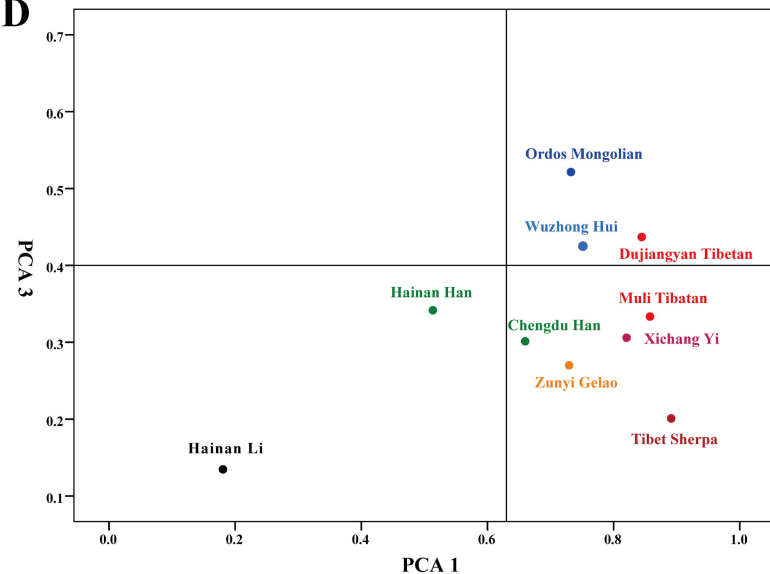

**A**

bioRxiv preprint doi: <https://doi.org/10.1101/2021.11.03.467770>; this version posted November 10, 2021. The copyright holder for this preprint (which was not certified by peer review) is the author/funder. All rights reserved. No reuse allowed without permission.

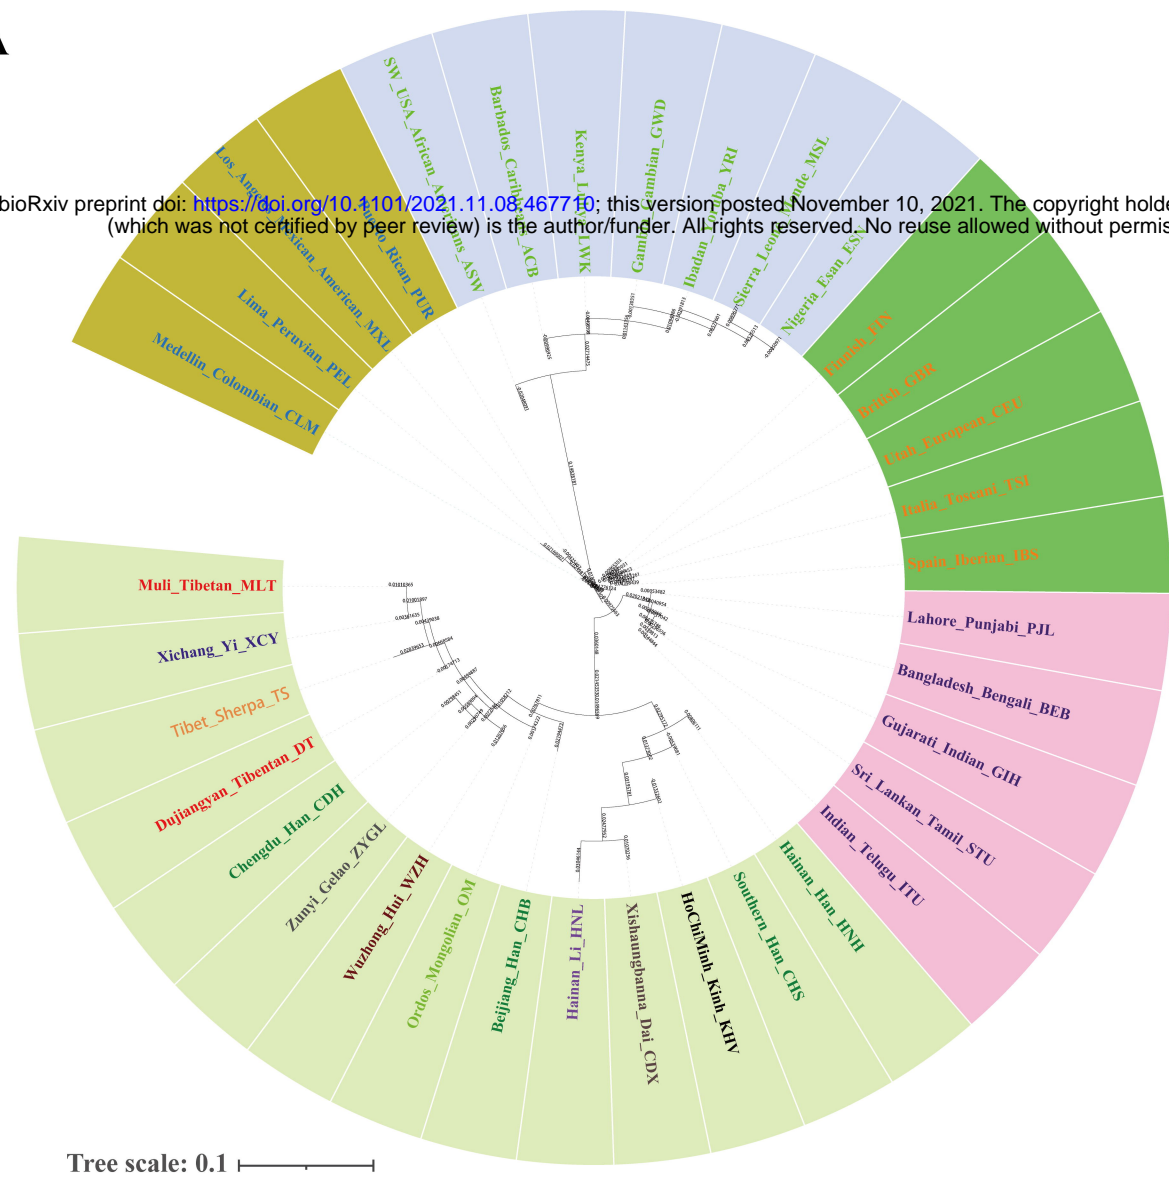**B**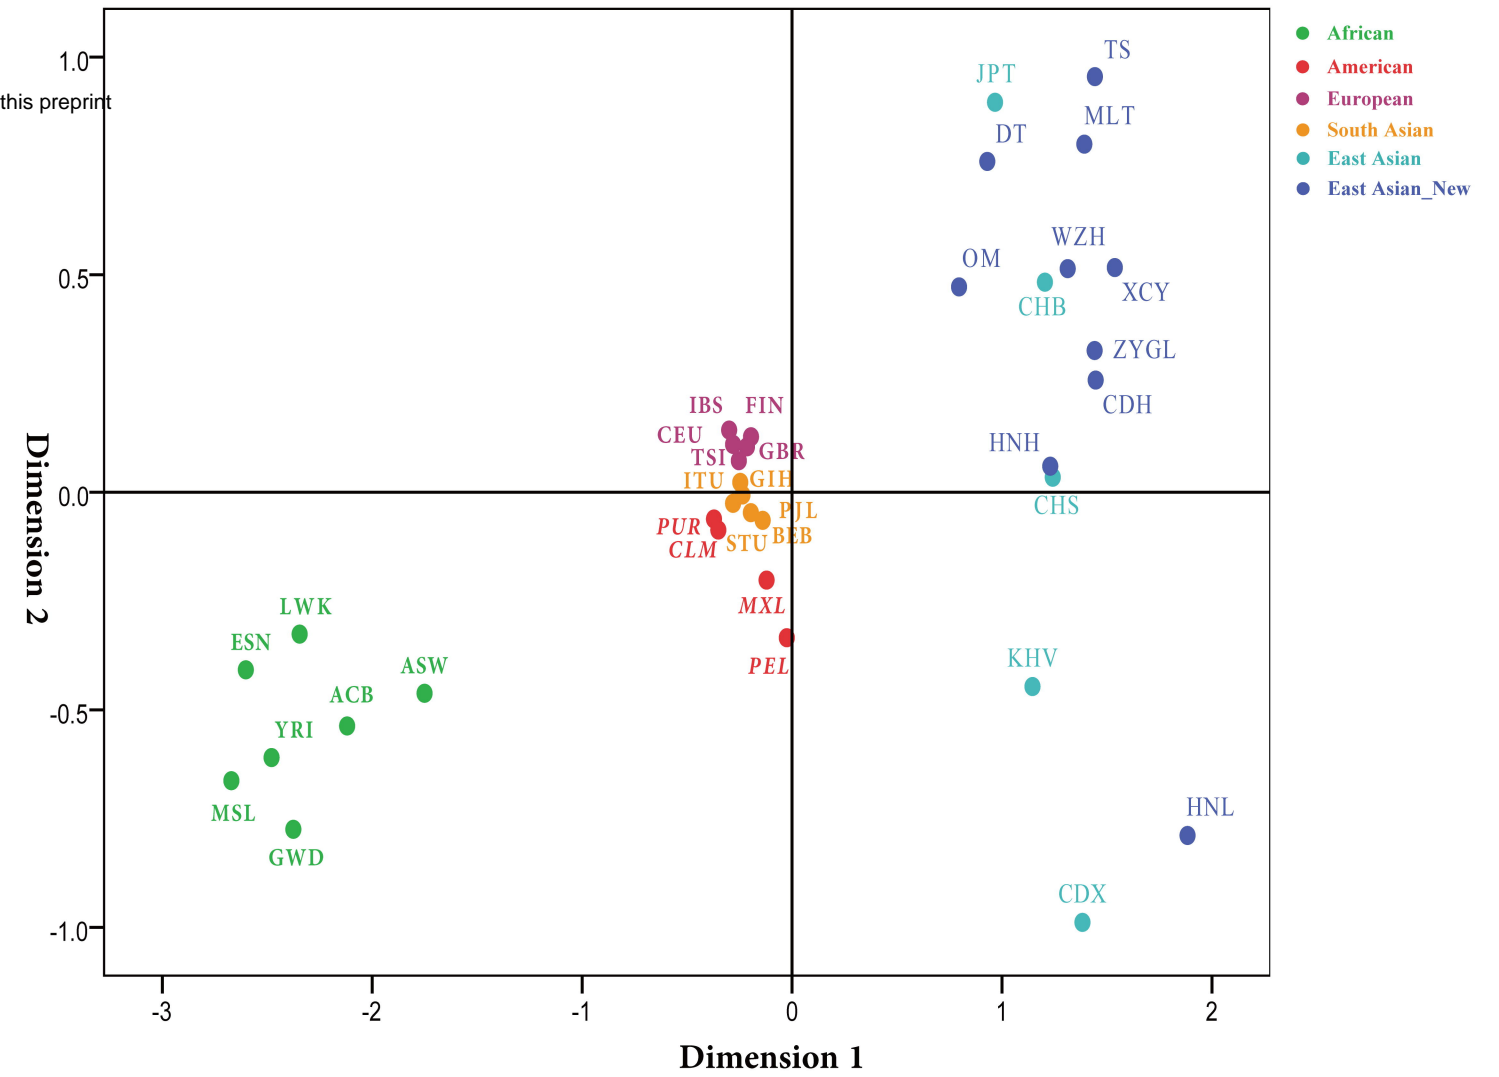**C**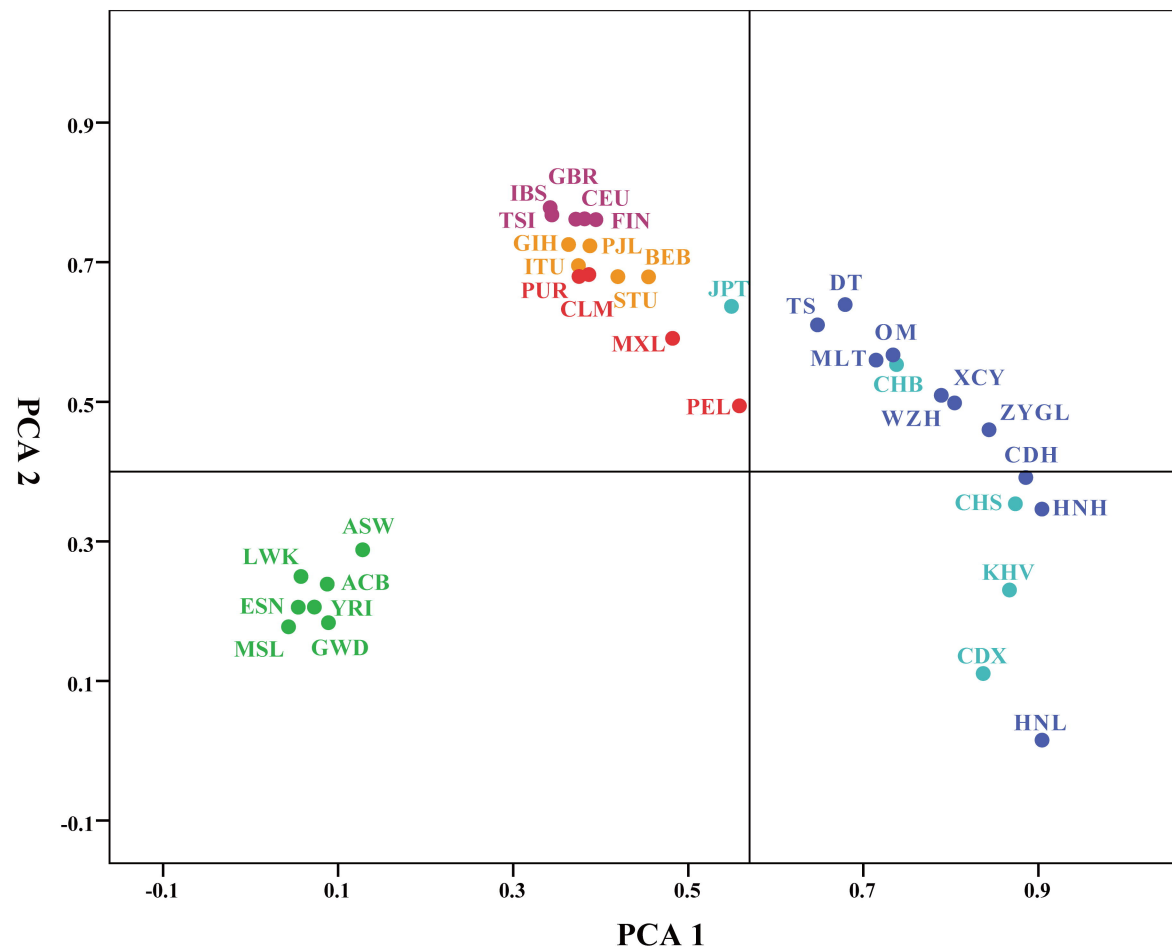**D**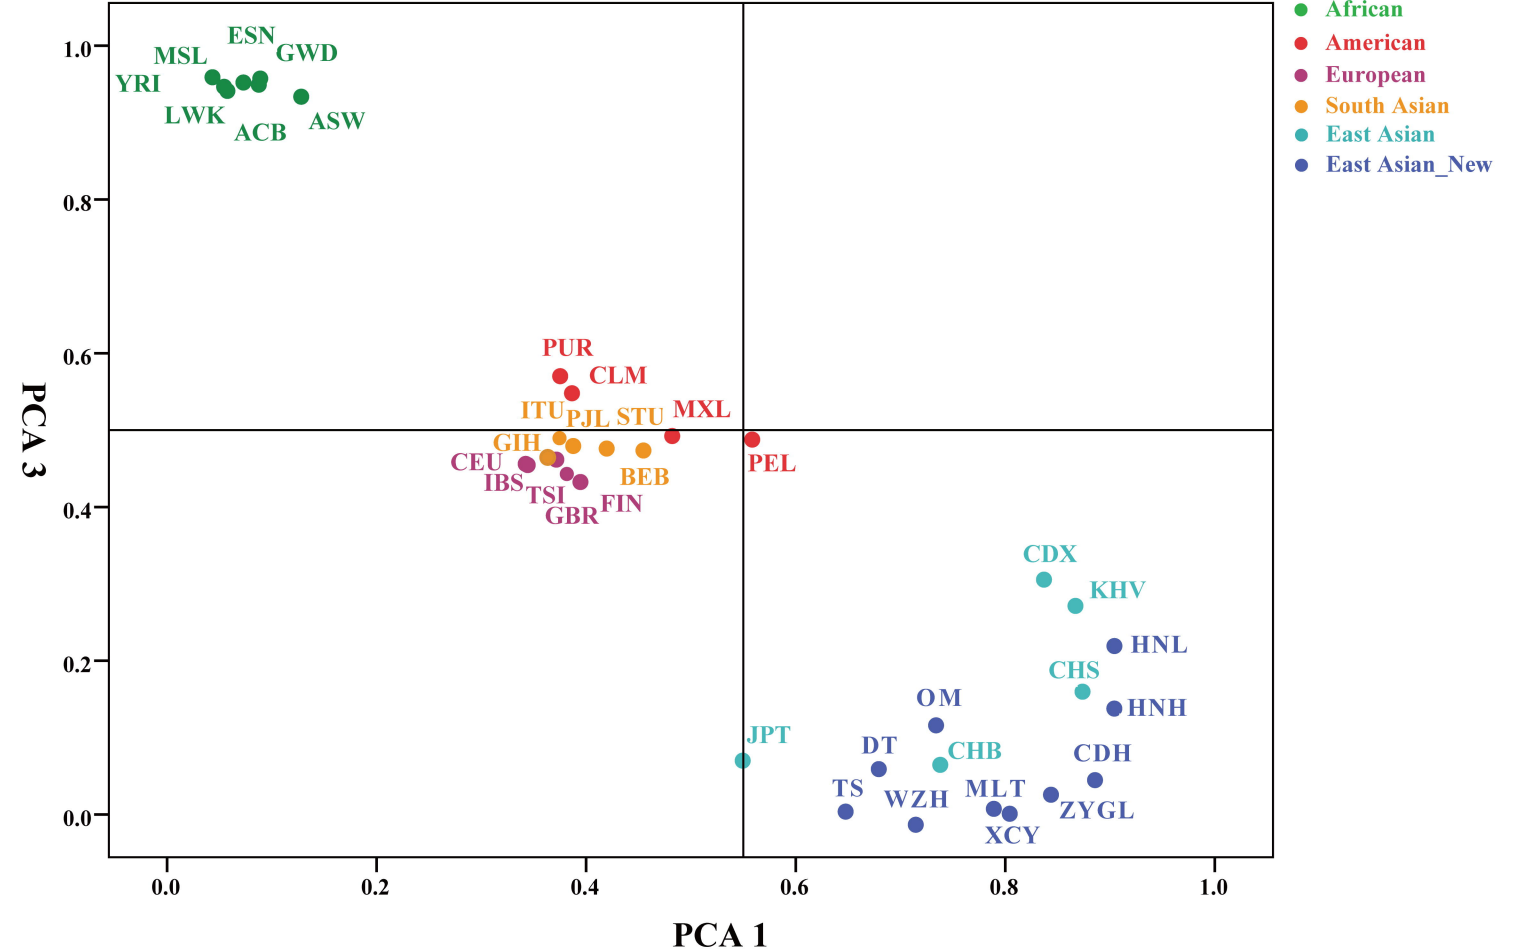

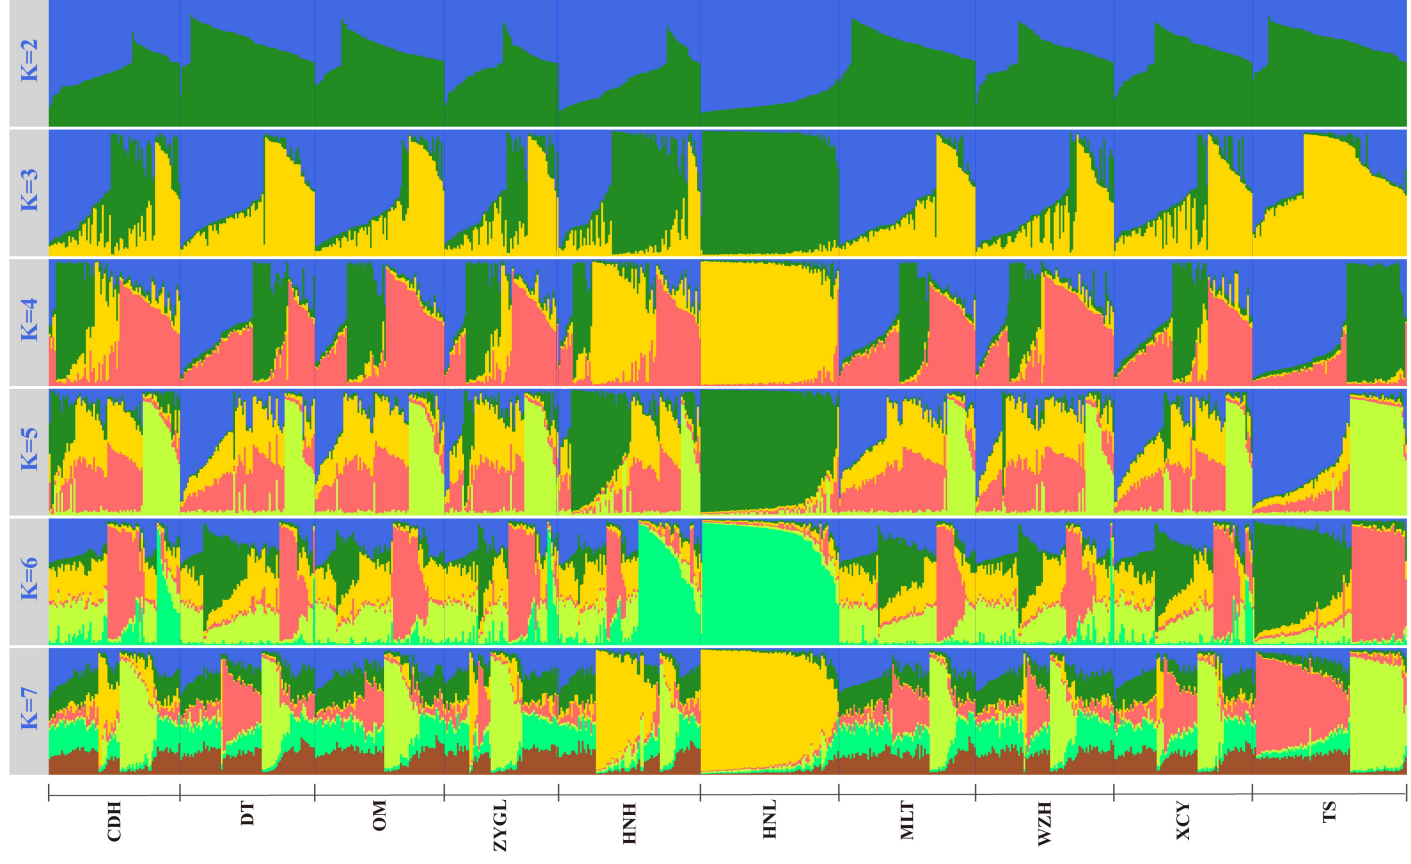

Source: http://biorxiv.org/content/10.1101/2021.11.08.467710v1.full.pdf
